# Supplementary material for: Biomaterial-assisted synthesis of AgCl@Ag concave cubes with efficient visible-light-driven photocatalytic activity
Source: Royal Society of Chemistry journal article supplement (doi:10.1039/c3ce41925h), 2013-10-22
Supplement: c3ce41925h.pdf [file c3ce41925h.pdf]

## *Supplementary Information*

### **Biomaterial-assisted synthesis of AgCl@Ag concave cubes with efficient visible-light-driven photocatalytic activity**

Pei Hu, Xianluo Hu\*, Chaoji Chen, Dongfang Hou and Yunhui Huang\*

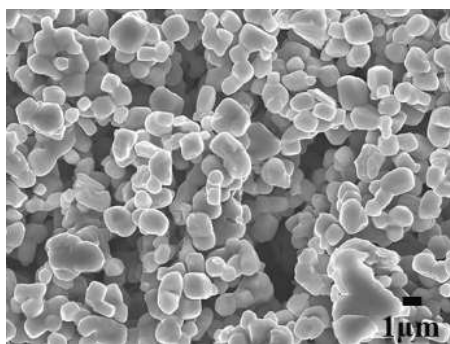

**Fig. S1** SEM image of the AgCl@Ag particles prepared in the absence of agar gel.

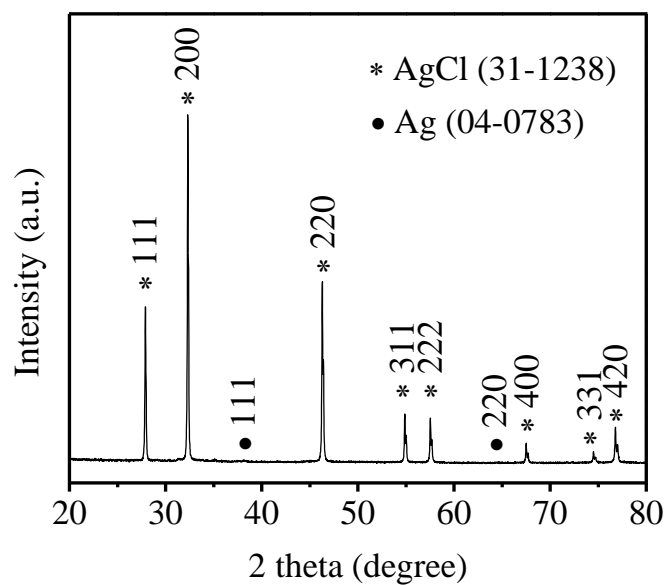

**Fig. S2** XRD pattern of the Ag@AgCl photocatalyst after the photocatalytic degradation of MO.
